# Supplementary material for: Is a College Education Still Enough? The IT-Labor Relationship with Education Level, Task Routineness, and Artificial Intelligence
Source: Atypon-hosted journal article supplement (doi:10.1287/isre.2021.0391), 2023-08-10
Supplement: isre.2021.0391.sm1.pdf [file isre.2021.0391.sm1.pdf]

# Is a College Education Still Enough? The IT-Labor Relationship with Education Level, Task Routineness, and Artificial Intelligence

## Online Appendix

### Appendix A: Summary of Literature on SBTC and RBTC

| Categories | Studies                       | Methods                | Time Periods            | Data Sources                                                | Measures of IT                                                                                                        | Measures of Labor                          | Key Findings                                                                                                                                                                | IT vs. Labor                                                                |
|------------|-------------------------------|------------------------|-------------------------|-------------------------------------------------------------|-----------------------------------------------------------------------------------------------------------------------|--------------------------------------------|-----------------------------------------------------------------------------------------------------------------------------------------------------------------------------|-----------------------------------------------------------------------------|
| SBTC       | Bartel and Lichtenberg (1987) | Regression analysis    | 1960, 1970, and 1980    | Bureau of Industrial Economics' Capital of Stocks Data Base | Experience of technology                                                                                              | Total labor cost                           | Firms introducing new technologies hire more skilled workers, although demand for educated workers declines as workers gain more experience with the technologies.          | Complements when technologies are new; substitutes as capital age increases |
|            | Bound and Johnson (1992)      | Regression analysis    | 1973-1979 and 1979-1988 | Current Population Survey                                   | Proportion of workers employed in industries where growth of efficiency differs from the industry-average growth rate | Aggregate employment and demographic group | Technical change is complementary to skilled workers and is the primary cause for the increase in wage difference between college-educated and non-college educated workers | Complements for college-educated labor                                      |
|            | Krueger (1993)                | Regression analysis    | 1984-1989               | Current Population Survey                                   | Whether a worker uses a computer at work                                                                              | Labor hours                                | Use of computers at work is associated with higher wages                                                                                                                    | Complements for educated labor with computer training                       |
|            | Autor et al. (1998)           | Correlational analysis | 1940-1996               | Current Population Survey                                   | Fraction of workers who directly use a computer keyboard                                                              | Labor hours                                | Persistent growth in relative demand for college graduates, which is correlated with increased use of computers among the                                                   | Complements for skilled labor                                               |

|      |                           |                                        |               |                                                                  |                                                                                                                                 |                  |                                                                                                                                                                                                            |                                                                            |
|------|---------------------------|----------------------------------------|---------------|------------------------------------------------------------------|---------------------------------------------------------------------------------------------------------------------------------|------------------|------------------------------------------------------------------------------------------------------------------------------------------------------------------------------------------------------------|----------------------------------------------------------------------------|
| SBTC |                           |                                        |               |                                                                  |                                                                                                                                 |                  | industries                                                                                                                                                                                                 |                                                                            |
|      | Acemoglu (1998)           | Analytical models                      | N/A           | N/A                                                              | N/A                                                                                                                             | N/A              | More skilled workers would increase the market for technologies, and hence new technologies will be complementary to skills                                                                                | Complements for skilled labor                                              |
|      | Goldin and Katz (1998)    | Regression analysis                    | 1909-1940     | Census of Manufactures, NBER Manufacturing Productivity Database | 1) Time dummy to capture cross-industry tech trends; 2) The change in the percentage of horsepower run by purchased electricity | Total labor cost | Both capital and technology are complements with skilled labor                                                                                                                                             | Complements for skilled or educated labor                                  |
|      | Bresnahan (1999)          | Theory development (qualitative)       | N/A           | N/A                                                              | N/A                                                                                                                             | N/A              | Technical changes in the organizations automate moderate-skill, white-collar work while increasing the demand for highly skilled professionals                                                             | Substitutes for moderate-skill labor; complements for highly skilled labor |
|      | Acemoglu (2002)           | Literature survey; regression analysis | Prior to 2002 | N/A                                                              | N/A                                                                                                                             | N/A              | Evidence for acceleration in skill bias when there is rapid technical change, which increases the skill premium for educated labor                                                                         | Complements for skilled labor                                              |
|      | Acemoglu and Autor (2011) | Analytical model                       | Prior to 2011 | N/A                                                              | N/A                                                                                                                             | N/A              | Authors proposed a task-based model in which the assignment of skills to tasks is endogenous and technical change may involve the substitution of machines for certain tasks previously performed by labor | Depends on skill level of labor and nature of the technical change         |
|      | Autor et al.              | OLS                                    | 1960-         | CPS/DOT                                                          | Percentage                                                                                                                      | Inputs of        | IT substitutes for workers in                                                                                                                                                                              | Substitutes or                                                             |

|      |                         |            |           |                                                                    |                                     |                                                                           |                                                                                                                                                                                                                                                                                                                              |                                              |
|------|-------------------------|------------|-----------|--------------------------------------------------------------------|-------------------------------------|---------------------------------------------------------------------------|------------------------------------------------------------------------------------------------------------------------------------------------------------------------------------------------------------------------------------------------------------------------------------------------------------------------------|----------------------------------------------|
| RBTC | (2003)                  |            | 1998      |                                                                    | of employees using computer at work | routine and nonroutine tasks                                              | performing routine tasks while complementing workers in performing nonroutine tasks.                                                                                                                                                                                                                                         | complements                                  |
|      | Autor et al. (2006)     | tabulation | 1980-1990 | CPS                                                                | N/A                                 | Percentage of change in employment share of jobs of different wage levels | IT complements nonroutine cognitive tasks, substitutes for routine tasks, and have little impact on nonroutine manual tasks                                                                                                                                                                                                  | Labor market polarization                    |
|      | Goos and Manning (2007) | OLS        | 1975-1999 | Britain New Earnings Survey (NES) and the Labor Force Survey (LFS) | N/A                                 | Percentage of change in employment share of jobs of different wage levels | IT leads to rising relative demand in well-paid, skilled jobs (that typically require nonroutine cognitive skills) and in low-paid, least-skilled jobs (that typically require nonroutine manual skills) and falling relative demand in the “middling” jobs that have typically required routine manual and cognitive skills | Job polarization                             |
|      | Autor et al. (2008)     | OLS        | 1963-2005 | CPS                                                                | N/A                                 | Percentage of change in employment share of jobs of different wage levels | IT complements highly educated workers engaged in abstract tasks, substitutes for moderately educated workers performing routine tasks, and has less impact on low-skilled workers performing manual tasks                                                                                                                   | Labor market polarization                    |
|      | Goos et al. (2009)      | OLS        |           | European Union Labour Force Survey (ELFS) in 16 European countries | N/A                                 | Change in employment share of jobs of different wage levels               | High- and low-paying occupations expand their employment shares relative to the occupations paying close to the mean wage; job polarization is pervasive in European countries                                                                                                                                               | Job routinization/ job and wage polarization |
|      | Acemoglu                | Plotting   | 1993-     | CPS/                                                               |                                     | Employment                                                                | Two trends are identified                                                                                                                                                                                                                                                                                                    | Job polarization                             |

|      |                        |            |                |                                           |             |                                                   |                                                                                                                                                                                                                                                                                                                                                                                                            |                                           |
|------|------------------------|------------|----------------|-------------------------------------------|-------------|---------------------------------------------------|------------------------------------------------------------------------------------------------------------------------------------------------------------------------------------------------------------------------------------------------------------------------------------------------------------------------------------------------------------------------------------------------------------|-------------------------------------------|
| RBTC | and Autor (2011)       |            | 2005/1992-2008 | Eurostat                                  |             | share at different skill levels                   | across US and European countries: rapid employment growth in both high- and low-education jobs, and substantially reduced share of employment accounted for by “middle skill” jobs                                                                                                                                                                                                                         |                                           |
|      | Autor and Dorn (2013)  | OLS        | 1980-2005      | American Community Survey (ACS)           | N/A         | Number of computers per employee                  | Industries with more routine tasks experience greater adoption of IT, coinciding with the displacement of labor from routine tasks; low-skill workers relocate from routine, task-intensive occupations to service occupations; wages increase for both high-skill, abstract and low-skill, manual labor; skill upgrade for labor, driven by complementarity between computer capital and high-skill labor | Polarization of labor market and earnings |
|      | Goos et al. (2014)     | tabulation | 1993-2010      | European Union Labour Force Survey (ELFS) | N/A         | Employment share of jobs at different wage levels | The employment structure in Western Europe has been polarizing, with rising employment shares for high-paid professionals and managers as well as low-paid, personal service workers and falling employment shares of manufacturing and routine office workers                                                                                                                                             | Labor force polarization                  |
|      | Michaels et al. (2014) | OLS        | 1980-2004      | EUKLEMS data from 11 countries            | ICT capital | Wages for labor of different skill levels         | Industries where ICT grew most strongly were those with the largest shifts toward the most skilled and the largest shifts away from the middle skilled, with the                                                                                                                                                                                                                                           | Polarization of labor market and earnings |

|  |  |  |  |  |  |  |                                     |  |
|--|--|--|--|--|--|--|-------------------------------------|--|
|  |  |  |  |  |  |  | least skilled largely<br>unaffected |  |
|--|--|--|--|--|--|--|-------------------------------------|--|

## Appendix B: Math Proof for Table 3 in the Paper

Let  $i$  and  $j$  be the quantities of inputs for factors  $i$  and  $j$ , and  $P_j$  be the price of factor  $j$ , and  $Q_j$  be the quantity input of factor  $j$ . Symbol  $\uparrow$  represents increase and  $\downarrow$  decrease.

If  $AES_{ij} > 0$ :  $P_j \uparrow \Rightarrow Q_j \downarrow$  and  $Q_i \uparrow$  (1)

Conclusion: input  $j$  is a substitute for input  $i$  regardless of MES. Mathematically,  $MES_{ij}$  can only be positive in this case; otherwise, it would conflict with (1).

If  $AES_{ij} < 0$ :  $P_j \uparrow \Rightarrow Q_j \downarrow$  and  $Q_i \downarrow$

If  $MES_{ij} > 0$ ,  $P_j \uparrow \Rightarrow Q_j \downarrow$  and  $\Delta Q_i / \Delta Q_j \uparrow \Rightarrow |\Delta Q_i\%| < |\Delta Q_j\%|$

Conclusion: input  $j$  is a weak complement for input  $i$ .

If  $MES_{ij} < 0$ ,  $P_j \uparrow \Rightarrow Q_j \downarrow$  and  $\Delta Q_i / \Delta Q_j \uparrow \Rightarrow |\Delta Q_i\%| > |\Delta Q_j\%|$

Conclusion: input  $j$  is a strong complement for input  $i$ .

## Appendix C: Steps for Estimating AES and MES from the Translog Function

### Step 1: AES for a general production function with three input factors

For a production function with three input factors,  $V = f(C, K, L)$ , the output elasticities of the inputs are given as:

$$1) \eta_C = \partial \log V / \partial \log C$$

$$2) \eta_K = \partial \log V / \partial \log K$$

$$3) \eta_L = \partial \log V / \partial \log L$$

For simplicity, we drop the industry and time subscripts of the variables. The marginal products are given as:

$$1) f_C = \partial V / \partial C = \eta_C \cdot (V / C)$$

$$2) f_K = \partial V / \partial K = \eta_K \cdot (V / K)$$

$$3) f_L = \partial V / \partial L = \eta_L \cdot (V / L)$$

The **Allen Elasticity of Substitution (AES)** between  $C$  and  $K$  is:

$$\sigma_{CK}^A = \frac{Cf_C + Kf_K + Lf_L}{CK} \cdot \frac{H_{CK}}{H}$$

where  $H$  is the determinant of the bordered Hessian:  $H = \begin{vmatrix} 0 & f_C & f_K & f_L \\ f_C & f_{CC} & f_{CK} & f_{CL} \\ f_K & f_{KC} & f_{KK} & f_{KL} \\ f_L & f_{LC} & f_{LK} & f_{LL} \end{vmatrix}$

and  $H_{CK}$  is the cofactor associated with  $f_{CK}$  in  $H$ , i.e.:  $H_{CK} = - \begin{vmatrix} 0 & f_C & f_L \\ f_K & f_{KC} & f_{KL} \\ f_L & f_{LC} & f_{LL} \end{vmatrix}$

Similarly:  $\sigma_{CL}^A = \frac{Cf_C + Kf_K + Lf_L}{CL} \cdot \frac{H_{CL}}{H}$ , and  $H_{CL} = \begin{vmatrix} 0 & f_C & f_K \\ f_K & f_{KC} & f_{KK} \\ f_L & f_{LC} & f_{LK} \end{vmatrix}$

and  $\sigma_{KL}^A = \frac{Cf_C + Kf_K + Lf_L}{KL} \cdot \frac{H_{KL}}{H}$ , and  $H_{KL} = - \begin{vmatrix} 0 & f_C & f_K \\ f_C & f_{CC} & f_{CK} \\ f_L & f_{LC} & f_{LL} \end{vmatrix}$

Step 2: AES for the Translog function with three input factors

Now if we apply the above to the Translog function:

$$\begin{aligned} \log(V) &= \delta + \alpha_C \log C + \alpha_K \log K + \alpha_L \log L \\ &\quad + \beta_{CC} (\log C)^2 + \beta_{KK} (\log K)^2 + \beta_{LL} (\log L)^2 \\ &\quad + \beta_{CK} \log C \log K + \beta_{CL} \log C \log L + \beta_{KL} \log K \log L + \varepsilon \end{aligned}$$

We have:

- 1)  $\eta_C = \partial \log V / \partial \log C = \alpha_C + 2\beta_{CC} \log C + \beta_{CK} \log K + \beta_{CL} \log L$
- 2)  $\eta_K = \partial \log V / \partial \log K = \alpha_K + 2\beta_{KK} \log K + \beta_{CK} \log C + \beta_{KL} \log L$
- 3)  $\eta_L = \partial \log V / \partial \log L = \alpha_L + 2\beta_{LL} \log L + \beta_{CL} \log C + \beta_{KL} \log K$

The marginal products are:

- 1)  $f_C = \eta_C \cdot (V / C)$
- 2)  $f_K = \eta_K \cdot (V / K)$
- 3)  $f_L = \eta_L \cdot (V / L)$

The second derivatives are:

- 1)  $f_{CC} = \frac{V}{C} \cdot \frac{2\beta_{CC}}{C} + \eta_C \frac{f_C C - V}{C^2} = \frac{2\beta_{CC} V}{C^2} + \frac{f_C^2}{V} - \frac{f_C}{C}$ ,  
 $f_{CK} = \frac{V}{C} \cdot \frac{\beta_{CK}}{K} + \eta_C \frac{f_K}{C} = \frac{V\beta_{CK}}{CK} + \frac{f_C f_K}{V}$ , and  
 $f_{CL} = \frac{V}{C} \cdot \frac{\beta_{CL}}{L} + \eta_C \frac{f_L}{C} = \frac{V\beta_{CL}}{CL} + \frac{f_C f_L}{V}$
- 2)  $f_{KC} = \frac{V}{K} \cdot \frac{\beta_{CK}}{C} + \eta_K \frac{f_C K}{C^2} = \frac{V\beta_{CK}}{KC} + \frac{f_K f_C}{V}$ ,  
 $f_{KK} = \frac{V}{K} \cdot \frac{2\beta_{KK}}{K} + \eta_K \frac{f_K K - V}{K^2} = \frac{2\beta_{KK} V}{K^2} + \frac{f_K^2}{V} - \frac{f_K}{K}$ , and  
 $f_{KL} = \frac{V}{K} \cdot \frac{\beta_{KL}}{L} + \eta_K \frac{f_L K}{K^2} = \frac{V\beta_{KL}}{KL} + \frac{f_K f_L}{V}$
- 3)  $f_{LC} = \frac{V}{L} \cdot \frac{\beta_{CL}}{C} + \eta_L \frac{f_C L}{L^2} = \frac{V\beta_{CL}}{LC} + \frac{f_L f_C}{V}$ ,

$$f_{LK} = \frac{V}{L} \cdot \frac{\beta_{KL}}{K} + \eta_L \frac{f_K L}{L^2} = \frac{V \beta_{KL}}{LK} + \frac{f_L f_K}{V}, \text{ and}$$

$$f_{LL} = \frac{V}{L} \cdot \frac{2\beta_{LL}}{L} - \eta_L \frac{f_L L - V}{L^2} = \frac{2\beta_{LL} V}{L^2} + \frac{f_L^2}{V} - \frac{f_L}{L}$$

(note:  $f_{ij} = f_{ji}$  )

and then,  $H$  ,  $H_{CK}$  ,  $H_{CL}$  ,  $H_{KL}$  ,  $\sigma_{CK}^A$  ,  $\sigma_{CL}^A$  , and  $\sigma_{KL}^A$  can all be calculated accordingly.

### Step 3: MES for a general production function with three input factors

The **Morishima elasticity of substitution (MES)** of the three factor inputs are:

$$\sigma_{CK}^M = \frac{f_K K}{f_C C + f_K K + f_L L} \cdot (\sigma_{CK}^A - \sigma_{KK}^A),$$

$$\sigma_{CL}^M = \frac{f_L L}{f_C C + f_K K + f_L L} \cdot (\sigma_{CL}^A - \sigma_{LL}^A), \text{ and}$$

$$\sigma_{KL}^M = \frac{f_L L}{f_C C + f_K K + f_L L} \cdot (\sigma_{KL}^A - \sigma_{LL}^A)$$

### Step 4: AES for the Translog function with five input factors

The five-factor Tanslog function proceeds in a similar manner:

$$\begin{aligned} \log(V) = & \delta + \alpha_C \log C + \alpha_K \log K + \alpha_{Lh} \log Lh + \alpha_{Lm} \log Lm + \alpha_{Ll} \log Ll \\ & + \beta_{CC} (\log C)^2 + \beta_{KK} (\log K)^2 + \beta_{LhLh} (\log Lh)^2 + \beta_{LmLm} (\log Lm)^2 + \beta_{LlLl} (\log Ll)^2 \\ & + \beta_{CK} \log C \log K + \beta_{CLh} \log C \log Lh + \beta_{CLm} \log C \log Lm + \beta_{CLl} \log C \log Ll \\ & + \beta_{KLh} \log K \log Lh + \beta_{KLm} \log K \log Lm + \beta_{KLl} \log K \log Ll \\ & + \beta_{LhLm} \log Lh \log Lm + \beta_{LhLl} \log Lh \log Ll + \beta_{LmLl} \log Lm \log Ll + \varepsilon \end{aligned} \quad (2)$$

We have:

- 1)  $\eta_C = \partial \log V / \partial \log C = \alpha_C + 2\beta_{CC} \log C + \beta_{CK} \log K + \beta_{CLh} \log Lh + \beta_{CLm} \log Lm + \beta_{CLl} \log Ll$
- 2)  $\eta_K = \partial \log V / \partial \log K = \alpha_K + 2\beta_{KK} \log K + \beta_{CK} \log C + \beta_{KLh} \log Lh + \beta_{KLm} \log Lm + \beta_{KLl} \log Ll$
- 3)  $\eta_{Lh} = \partial \log V / \partial \log Lh = \alpha_{Lh} + 2\beta_{LhLh} \log Lh + \beta_{CLh} \log C + \beta_{KLh} \log K + \beta_{LhLm} \log Lm + \beta_{LhLl} \log Ll$
- 4)  $\eta_{Lm} = \partial \log V / \partial \log Lm = \alpha_{Lm} + 2\beta_{LmLm} \log Lm + \beta_{CLm} \log C + \beta_{KLm} \log K + \beta_{LhLm} \log Lh + \beta_{LmLl} \log Ll$
- 5)  $\eta_{Ll} = \partial \log V / \partial \log Ll = \alpha_{Ll} + 2\beta_{LlLl} \log Ll + \beta_{CLl} \log C + \beta_{KLl} \log K + \beta_{LhLl} \log Lh + \beta_{LmLl} \log Lm$

The marginal products are:

- 1)  $f_C = \eta_C \cdot (V / C)$
- 2)  $f_K = \eta_K \cdot (V / K)$
- 3)  $f_{Lh} = \eta_{Lh} \cdot (V / Lh)$
- 4)  $f_{Lm} = \eta_{Lm} \cdot (V / Lm)$

$$5) f_{LL} = \eta_{LL} \cdot (V / LL)$$

The second derivatives are:

$$\begin{aligned}
1) \quad f_{CC} &= \frac{2\beta_{CC}V}{C^2} + \frac{f_C^2}{V} - \frac{f_C}{C}, & f_{CK} &= \frac{V\beta_{CK}}{CK} + \frac{f_C f_K}{V}, & f_{CLh} &= \frac{V\beta_{CLh}}{CLh} + \frac{f_C f_{Lh}}{V}, \\
f_{CLm} &= \frac{V\beta_{CLm}}{CLm} + \frac{f_C f_{Lm}}{V}, \text{ and } f_{CLl} &= \frac{V\beta_{CLl}}{CLl} + \frac{f_C f_{Ll}}{V} \\
2) \quad f_{KC} &= \frac{V\beta_{CK}}{KC} + \frac{f_K f_C}{V}, & f_{KK} &= \frac{2\beta_{KK}V}{K^2} + \frac{f_K^2}{V} - \frac{f_K}{K}, & f_{KLh} &= \frac{V\beta_{KLh}}{KLh} + \frac{f_K f_{Lh}}{V}, \\
f_{KLm} &= \frac{V\beta_{KLm}}{KLm} + \frac{f_K f_{Lm}}{V}, \text{ and } f_{KLI} &= \frac{V\beta_{KLI}}{KLI} + \frac{f_K f_{LI}}{V} \\
3) \quad f_{LhC} &= \frac{V\beta_{CLh}}{LhC} + \frac{f_{Lh} f_C}{V}, & f_{LhK} &= \frac{V\beta_{KLh}}{LhK} + \frac{f_{Lh} f_K}{V}, & f_{LhLh} &= \frac{2\beta_{LhLh}V}{Lh^2} + \frac{f_{Lh}^2}{V} - \frac{f_{Lh}}{Lh}, \\
f_{LhLm} &= \frac{V\beta_{LmLh}}{LhLm} + \frac{f_{Lh} f_{Lm}}{V}, \text{ and } f_{LhLI} &= \frac{V\beta_{LlLh}}{LhLI} + \frac{f_{Lh} f_{LI}}{V} \\
4) \quad f_{LmC} &= \frac{V\beta_{CLm}}{LmC} + \frac{f_{Lm} f_C}{V}, & f_{LmK} &= \frac{V\beta_{KLm}}{LmK} + \frac{f_{Lm} f_K}{V}, & f_{LmLh} &= \frac{V\beta_{LmLh}}{LhLm} + \frac{f_{Lh} f_{Lm}}{V} \\
f_{LmLm} &= \frac{2\beta_{LmLm}V}{Lm^2} + \frac{f_{Lm}^2}{V} - \frac{f_{Lm}}{Lm}, \text{ and } f_{LmLI} &= \frac{V\beta_{LmLI}}{LmLI} + \frac{f_{Lm} f_{LI}}{V} \\
5) \quad f_{LlLl} &= \frac{2\beta_{LlLl}V}{Ll^2} + \frac{f_{Ll}^2}{V} - \frac{f_{Ll}}{Ll}
\end{aligned}$$

(note:  $f_{ij} = f_{ji}$ )

The AES between C and K is:

$$\sigma_{CK}^A = \frac{\sum(x_i f_i) \cdot H_{CK}}{CK \cdot H},$$

where  $\sum(x_i f_i) = Cf_C + Kf_K + Lhf_{Lh} + Lmf_{Lm} + Ll f_{Ll}$ , H is the determinant of the bordered Hessian:

$$H = \begin{vmatrix}
0 & f_C & f_K & f_{Lh} & f_{Lm} & f_{Ll} \\
f_C & f_{CC} & f_{CK} & f_{CLh} & f_{CLm} & f_{CLl} \\
f_K & f_{KC} & f_{KK} & f_{KLh} & f_{KLm} & f_{KLI} \\
f_{Lh} & f_{LhC} & f_{LhK} & f_{LhLh} & f_{LhLm} & f_{LhLI} \\
f_{Lm} & f_{LmC} & f_{LmK} & f_{LmLh} & f_{LmLm} & f_{LmLI} \\
f_{Ll} & f_{LlC} & f_{LlK} & f_{LlLh} & f_{LlLm} & f_{LlLI}
\end{vmatrix}$$

$$\text{and } H_{CK} \text{ is the cofactor associated with } f_{CK} \text{ in H, i.e.: } H_{CK} = - \begin{vmatrix}
0 & f_C & f_{Lh} & f_{Lm} & f_{Ll} \\
f_K & f_{KC} & f_{KLh} & f_{KLm} & f_{KLI} \\
f_{Lh} & f_{LhC} & f_{LhLh} & f_{LhLm} & f_{LhLI} \\
f_{Lm} & f_{LmC} & f_{LmLh} & f_{LmLm} & f_{LmLI} \\
f_{Ll} & f_{LlC} & f_{LlLh} & f_{LlLm} & f_{LlLI}
\end{vmatrix}$$

Similarly:

$$\sigma_{CLh}^A = \frac{\sum(x_i f_i)}{C \cdot Lh} \cdot \frac{H_{CLh}}{H}, \text{ and } H_{CLh} = \begin{vmatrix} 0 & f_C & f_K & f_{Lm} & f_{LI} \\ f_K & f_{KC} & f_{KK} & f_{KLm} & f_{KLI} \\ f_{Lh} & f_{LhC} & f_{LhK} & f_{LhLm} & f_{LhLI} \\ f_{Lm} & f_{LmC} & f_{LmK} & f_{LmLm} & f_{LmLI} \\ f_{LI} & f_{LIC} & f_{LIK} & f_{LILm} & f_{LILI} \end{vmatrix}$$

$$\sigma_{CLm}^A = \frac{\sum(x_i f_i)}{C \cdot Lm} \cdot \frac{H_{CLm}}{H}, \text{ and } H_{CLm} = - \begin{vmatrix} 0 & f_C & f_K & f_{Lh} & f_{LI} \\ f_K & f_{KC} & f_{KK} & f_{KLh} & f_{KLI} \\ f_{Lh} & f_{LhC} & f_{LhK} & f_{LhLh} & f_{LhLI} \\ f_{Lm} & f_{LmC} & f_{LmK} & f_{LmLh} & f_{LmLI} \\ f_{LI} & f_{LIC} & f_{LIK} & f_{LILh} & f_{LILI} \end{vmatrix}$$

$$\sigma_{CLI}^A = \frac{\sum(x_i f_i)}{C \cdot LI} \cdot \frac{H_{CLI}}{H}, \text{ and } H_{CLI} = \begin{vmatrix} 0 & f_C & f_K & f_{Lh} & f_{Lm} \\ f_K & f_{KC} & f_{KK} & f_{KLh} & f_{KLM} \\ f_{Lh} & f_{LhC} & f_{LhK} & f_{LhLh} & f_{LhLm} \\ f_{Lm} & f_{LmC} & f_{LmK} & f_{LmLh} & f_{LmLm} \\ f_{LI} & f_{LIC} & f_{LIK} & f_{LILh} & f_{LILm} \end{vmatrix}$$

Step 5: MES for the Translog function with five input factors

The MES between  $C$ ,  $K$ , and three levels of  $L$  are:

$$\sigma_{CK}^M = \frac{f_K K}{f_C C + f_K K + f_{Lh} Lh + f_{Lm} Lm + f_{LI} LI} \cdot (\sigma_{CK}^A - \sigma_{KK}^A),$$

$$\sigma_{CLh}^M = \frac{f_{Lh} Lh}{f_C C + f_K K + f_{Lh} Lh + f_{Lm} Lm + f_{LI} LI} \cdot (\sigma_{CLh}^A - \sigma_{LhLh}^A),$$

$$\sigma_{CLm}^M = \frac{f_{Lm} Lm}{f_C C + f_K K + f_{Lh} Lh + f_{Lm} Lm + f_{LI} LI} \cdot (\sigma_{CLm}^A - \sigma_{LmLm}^A), \text{ and}$$

$$\sigma_{CLI}^M = \frac{f_{LI} LI}{f_C C + f_K K + f_{Lh} Lh + f_{Lm} Lm + f_{LI} LI} \cdot (\sigma_{CLI}^A - \sigma_{LILI}^A)$$

## Appendix D: Three-Digit NAICS Industry Descriptions

|  |            |
|--|------------|
|  | High AIE   |
|  | High STEM  |
|  | Nonroutine |

| 2007 NAICS Code | NAICS Code | NAICS Code | Industry Title                                   |
|-----------------|------------|------------|--------------------------------------------------|
| 111CA           | 111CA      | 111CA      | Farms                                            |
| 113FF           | 113FF      | 113FF      | Forestry, fishing, and related activities        |
| 211             | 211        | 211        | Oil and gas extraction                           |
| 212             | 212        | 212        | Mining, except oil and gas                       |
| 213             | 213        | 213        | Support activities for mining                    |
| 22              | 22         | 22         | Utilities                                        |
| 23              | 23         | 23         | Construction                                     |
| 311FT           | 311FT      | 311FT      | Food and beverage and tobacco products           |
| 315AL           | 315AL      | 315AL      | Apparel and leather and allied products          |
| 321             | 321        | 321        | Wood products                                    |
| 322             | 322        | 322        | Paper products                                   |
| 323             | 323        | 323        | Printing and related support activities          |
| 324             | 324        | 324        | Petroleum and coal products                      |
| 325             | 325        | 325        | Chemical products                                |
| 326             | 326        | 326        | Plastics and rubber products                     |
| 327             | 327        | 327        | Nonmetallic mineral products                     |
| 331             | 331        | 331        | Primary metals                                   |
| 332             | 332        | 332        | Fabricated metal products                        |
| 333             | 333        | 333        | Machinery                                        |
| 334             | 334        | 334        | Computer and electronic products                 |
| 335             | 335        | 335        | Electrical equipment, appliances, and components |
| 3361MV          | 3361MV     | 3361MV     | Motor vehicles, bodies and trailers, and parts   |
| 3364OT          | 3364OT     | 3364OT     | Other transportation equipment                   |
| 337             | 337        | 337        | Furniture and related products                   |
| 339             | 339        | 339        | Miscellaneous manufacturing                      |
| 42              | 42         | 42         | Wholesale trade                                  |
| 44RT            | 44RT       | 44RT       | Retail trade                                     |
| 481             | 481        | 481        | Air transportation                               |
| 482             | 482        | 482        | Rail transportation                              |
| 483             | 483        | 483        | Water transportation                             |
| 484             | 484        | 484        | Truck transportation                             |
| 485             | 485        | 485        | Transit and ground passenger transportation      |
| 486             | 486        | 486        | Pipeline transportation                          |
| 487OS           | 487OS      | 487OS      | Other transportation and support activities      |
| 493             | 493        | 493        | Warehousing and storage                          |

|        |        |        |                                                                      |
|--------|--------|--------|----------------------------------------------------------------------|
| 511    | 511    | 511    | Publishing industries, except internet (includes software)           |
| 512    | 512    | 512    | Motion picture and sound recording industries                        |
| 513    | 513    | 513    | Broadcasting and telecommunications                                  |
| 514    | 514    | 514    | Data processing, internet publishing, and other information services |
| 521CI  | 521CI  | 521CI  | Federal Reserve banks, credit intermediation, and related activities |
| 523    | 523    | 523    | Securities, commodity contracts, and investments                     |
| 524    | 524    | 524    | Insurance carriers and related activities                            |
| 531    | 531    | 531    | Real Estate                                                          |
| 532RL  | 532RL  | 532RL  | Rental and leasing services and lessors of intangible assets         |
| 5411   | 5411   | 5411   | Legal services                                                       |
| 5412OP | 5412OP | 5412OP | Miscellaneous professional, scientific, and technical services       |
| 5415   | 5415   | 5415   | Computer systems design and related services                         |
| 55     | 55     | 55     | Management of companies and enterprises                              |
| 561    | 561    | 561    | Administrative and support services                                  |
| 562    | 562    | 562    | Waste management and remediation services                            |
| 61     | 61     | 61     | Educational services                                                 |
| 621    | 621    | 621    | Ambulatory health care services                                      |
| 622    | 622    | 622    | Hospitals                                                            |
| 623    | 623    | 623    | Nursing and residential care facilities                              |
| 624    | 624    | 624    | Social assistance                                                    |
| 711AS  | 711AS  | 711AS  | Performing arts, spectator sports, museums, and related activities   |
| 713    | 713    | 713    | Amusements, gambling, and recreation industries                      |
| 721    | 721    | 721    | Accommodation                                                        |
| 722    | 722    | 722    | Food services and drinking places                                    |
| 81     | 81     | 81     | Other services, except government                                    |

## Appendix E: Summary Statistics

**Table A1. Summary Statistics (1998-2013)**

| <b>Samples</b>                                                 | <b>Variable</b>                                                | <b>Mean</b>              | <b>Std. dev.</b> | <b>Min.</b> | <b>Max.</b> |
|----------------------------------------------------------------|----------------------------------------------------------------|--------------------------|------------------|-------------|-------------|
| Full Sample (N=952)                                            | Value Added ( $V_{it}$ )                                       | 205,987                  | 270,856          | 5,511       | 1,865,536   |
|                                                                | IT Capital ( $C_{it}$ )                                        | 24,559                   | 45,787           | 514         | 406,635     |
|                                                                | Non-IT Capital ( $K_{it}$ )                                    | 254,424                  | 305,216          | 12,909      | 1,814,622   |
|                                                                | High-education Labor ( $Lh_{it}$ )                             | 156                      | 254              | 0           | 1,429       |
|                                                                | Middle-education Labor ( $Lm_{it}$ )                           | 847                      | 1,113            | 0           | 6,733       |
|                                                                | Low-education Labor ( $Ll_{it}$ )                              | 729                      | 1,173            | 0           | 6,773       |
|                                                                | Average Work Experience for $Lh_{it}$ ( $edu\_hig\_exp_{it}$ ) | 21                       | 5                | 0           | 46          |
|                                                                | Average Work Experience for $Lm_{it}$ ( $edu\_mid\_exp_{it}$ ) | 22                       | 2                | 0           | 45          |
|                                                                | Average Work Experience for $Ll_{it}$ ( $edu\_low\_exp_{it}$ ) | 27                       | 2                | 0           | 33          |
|                                                                | Routine-intensive Industries (N=476)                           | Value Added ( $V_{it}$ ) | 171,151          | 187,371     | 10,948      |
| IT Capital ( $C_{it}$ )                                        |                                                                | 26,684                   | 58,338           | 630         | 406,635     |
| Non-IT Capital ( $K_{it}$ )                                    |                                                                | 314,231                  | 372,348          | 12,908      | 1,814,622   |
| High-education Labor ( $Lh_{it}$ )                             |                                                                | 136                      | 244              | 0           | 1,429       |
| Middle-education Labor ( $Lm_{it}$ )                           |                                                                | 842                      | 1,294            | 0           | 6,733       |
| Low-education Labor ( $Ll_{it}$ )                              |                                                                | 815                      | 1,347            | 0           | 6,773       |
| Average Work Experience for $Lh_{it}$ ( $edu\_hig\_exp_{it}$ ) |                                                                | 20                       | 4                | 0           | 32          |
| Average Work Experience for $Lm_{it}$ ( $edu\_mid\_exp_{it}$ ) |                                                                | 22                       | 2                | 0           | 45          |
| Average Work Experience for $Ll_{it}$ ( $edu\_low\_exp_{it}$ ) |                                                                | 26                       | 3                | 0           | 33          |
| Nonroutine-intensive Industries (N=476)                        |                                                                | Value Added ( $V_{it}$ ) | 240,822          | 330,666     | 5,510       |
|                                                                | IT Capital ( $C_{it}$ )                                        | 22,433                   | 28,013           | 514         | 157,147     |
|                                                                | Non-IT Capital ( $K_{it}$ )                                    | 194,616                  | 201,736          | 13,783      | 1,086,064   |
|                                                                | High-education Labor ( $Lh_{it}$ )                             | 176                      | 263              | 0           | 1,285       |
|                                                                | Middle-education Labor ( $Lm_{it}$ )                           | 852                      | 898              | 21          | 3,331       |
|                                                                | Low-education Labor                                            | 643                      | 964              | 15          | 4,753       |

|                                                                   |                                                                   |                          |         |         |           |
|-------------------------------------------------------------------|-------------------------------------------------------------------|--------------------------|---------|---------|-----------|
|                                                                   | $(L_{it})$                                                        |                          |         |         |           |
|                                                                   | Average Work Experience for $L_{h_{it}}$ ( $edu\_hig\_exp_{it}$ ) | 22                       | 5       | 0       | 46        |
|                                                                   | Average Work Experience for $L_{m_{it}}$ ( $edu\_mid\_exp_{it}$ ) | 22                       | 2       | 15      | 28        |
|                                                                   | Average Work Experience for $L_{l_{it}}$ ( $edu\_low\_exp_{it}$ ) | 27                       | 3       | 19      | 33        |
| High AI-exposure Industries (N=444)                               | Value Added ( $V_{it}$ )                                          | 309,827                  | 342,508 | 25,417  | 1,865,536 |
|                                                                   | IT Capital ( $C_{it}$ )                                           | 44,469                   | 60,467  | 808     | 406,635   |
|                                                                   | Non-IT Capital ( $K_{it}$ )                                       | 338,540                  | 382,982 | 13,783  | 1,814,622 |
|                                                                   | High-education Labor ( $L_{h_{it}}$ )                             | 266                      | 317     | 3       | 1,429     |
|                                                                   | Middle-education Labor ( $L_{m_{it}}$ )                           | 1,047                    | 924     | 44      | 3,331     |
|                                                                   | Low-education Labor ( $L_{l_{it}}$ )                              | 579                      | 757     | 36      | 4,141     |
|                                                                   | Average Work Experience for $L_{h_{it}}$ ( $edu\_hig\_exp_{it}$ ) | 20                       | 3       | 6       | 46        |
|                                                                   | Average Work Experience for $L_{m_{it}}$ ( $edu\_mid\_exp_{it}$ ) | 22                       | 2       | 16      | 27        |
|                                                                   | Average Work Experience for $L_{l_{it}}$ ( $edu\_low\_exp_{it}$ ) | 27                       | 2       | 20      | 34        |
|                                                                   | Low AI-exposure Industries (N=444)                                | Value Added ( $V_{it}$ ) | 119,152 | 139,062 | 5,510     |
| IT Capital ( $C_{it}$ )                                           |                                                                   | 6,699                    | 8,983   | 514     | 63,026    |
| Non-IT Capital ( $K_{it}$ )                                       |                                                                   | 180,017                  | 189,658 | 19,256  | 1,083,802 |
| High-education Labor ( $L_{h_{it}}$ )                             |                                                                   | 65                       | 122     | 0       | 602       |
| Middle-education Labor ( $L_{m_{it}}$ )                           |                                                                   | 740                      | 1300    | 0       | 6733      |
| Low-education Labor ( $L_{l_{it}}$ )                              |                                                                   | 943                      | 1511    | 0       | 6773      |
| Average Work Experience for $L_{h_{it}}$ ( $edu\_hig\_exp_{it}$ ) |                                                                   | 21                       | 5       | 0       | 43        |
| Average Work Experience for $L_{m_{it}}$ ( $edu\_mid\_exp_{it}$ ) |                                                                   | 22                       | 2       | 0       | 45        |
| Average Work Experience for $L_{l_{it}}$ ( $edu\_low\_exp_{it}$ ) |                                                                   | 26                       | 2       | 0       | 33        |
| High-STEM Industries (N=476)                                      |                                                                   | Value Added ( $V_{it}$ ) | 181,145 | 196,466 | 5,510     |
|                                                                   | IT Capital ( $C_{it}$ )                                           | 29,873                   | 55,551  | 1,562   | 406,635   |
|                                                                   | Non-IT Capital ( $K_{it}$ )                                       | 269,684                  | 348,480 | 13,783  | 1,814,622 |
|                                                                   | High-education                                                    | 114                      | 201     | 0       | 1284      |

|                             |                                                                |         |         |        |           |
|-----------------------------|----------------------------------------------------------------|---------|---------|--------|-----------|
|                             | Labor ( $L_{it}$ )                                             |         |         |        |           |
|                             | Middle-education Labor ( $Lm_{it}$ )                           | 537     | 603     | 17     | 3213      |
|                             | Low-education Labor ( $Ll_{it}$ )                              | 317     | 255     | 10     | 1196      |
|                             | Average Work Experience for $L_{it}$ ( $edu\_hig\_exp_{it}$ )  | 20      | 4       | 0      | 46        |
|                             | Average Work Experience for $Lm_{it}$ ( $edu\_mid\_exp_{it}$ ) | 22      | 3       | 16     | 28        |
|                             | Average Work Experience for $Ll_{it}$ ( $edu\_low\_exp_{it}$ ) | 26      | 3       | 19     | 34        |
| Low-STEM Industries (N=476) | Value Added ( $V_{it}$ )                                       | 230,413 | 326,332 | 20,668 | 1,865,536 |
|                             | IT Capital ( $C_{it}$ )                                        | 19,332  | 32,750  | 514    | 209,152   |
|                             | Non-IT Capital ( $K_{it}$ )                                    | 239,416 | 255,122 | 12,908 | 1,086,064 |
|                             | High-education Labor ( $Lh_{it}$ )                             | 196     | 292     | 0      | 1429      |
|                             | Middle-education Labor ( $Lm_{it}$ )                           | 1152    | 1383    | 0      | 6733      |
|                             | Low-education Labor ( $Ll_{it}$ )                              | 1134    | 1529    | 0      | 6773      |
|                             | Average Work Experience for $Lh_{it}$ ( $edu\_hig\_exp_{it}$ ) | 21      | 4       | 0      | 42        |
|                             | Average Work Experience for $Lm_{it}$ ( $edu\_mid\_exp_{it}$ ) | 22      | 2       | 0      | 45        |
|                             | Average Work Experience for $Ll_{it}$ ( $edu\_low\_exp_{it}$ ) | 26      | 3       | 0      | 32        |

Notes: Labor variables are in thousands of full-time equivalent employees.  $V_{it}$ ,  $C_{it}$ , and  $K_{it}$  are in millions of 2009 dollars, and average work experience is measured in number of years.

## Appendix F: Coefficient Estimates for Regressions

Table A2. Estimated Coefficients from the Production Functions (Full Sample)

| Independent Variables | Cobb-Douglas FGLS   | Translog Equation (3) FGLS | Translog Equation (4) FGLS | Translog Equation (4) GMM |
|-----------------------|---------------------|----------------------------|----------------------------|---------------------------|
| $\alpha_C$            | 0.201***<br>(0.017) | 0.510***<br>(0.143)        | 0.573***<br>(0.114)        | 2.504***<br>(0.865)       |
| $\alpha_K$            | 0.307***<br>(0.021) | 0.392***<br>(0.123)        | -0.924<br>(0.655)          | 0.909<br>(1.008)          |
| $\alpha_L$            | 0.399***<br>(0.018) | 2.327***<br>(0.207)        |                            |                           |

|                |     |                      |                      |                     |
|----------------|-----|----------------------|----------------------|---------------------|
| $\alpha_{Lh}$  |     |                      | 0.398***<br>(0.086)  | 4.210***<br>(1.384) |
| $\alpha_{Lm}$  |     |                      | 0.317*<br>(0.172)    | 0.503***<br>(0.047) |
| $\alpha_{Ll}$  |     |                      | 0.166**<br>(0.078)   | 7.610***<br>(2.666) |
| $\beta_{CC}$   |     | 0.028***<br>(0.007)  | 0.016**<br>(0.006)   | 0.167<br>(0.102)    |
| $\beta_{CK}$   |     | -0.055***<br>(0.015) | -0.073***<br>(0.013) | -0.280**<br>(0.118) |
| $\beta_{CL}$   |     | -0.037***<br>(0.013) |                      |                     |
| $\beta_{CLh}$  |     |                      | -0.010<br>(0.008)    | 0.3105<br>(0.196)   |
| $\beta_{CLm}$  |     |                      | 0.023<br>(0.016)     | -1.277*<br>(0.699)  |
| $\beta_{CLl}$  |     |                      | 0.005*<br>(0.002)    | 0.783**<br>(0.394)  |
| $\beta_{KK}$   |     | 0.048***<br>(0.009)  | 0.086***<br>(0.009)  | 0.081*<br>(0.042)   |
| $\beta_{KL}$   |     | -0.106***<br>(0.017) |                      |                     |
| $\beta_{KLh}$  |     |                      | -0.002<br>(0.008)    | 0.060<br>(0.180)    |
| $\beta_{KLm}$  |     |                      | -0.025<br>(0.018)    | 0.397<br>(0.326)    |
| $\beta_{KLl}$  |     |                      | 0.006<br>(0.008)     | -0.447<br>(0.472)   |
| $\beta_{LL}$   |     | -0.013<br>(0.009)    |                      |                     |
| $\beta_{LhLh}$ |     |                      | 0.031***<br>(0.006)  | 0.411*<br>(0.246)   |
| $\beta_{LhLm}$ |     |                      | -0.027<br>(0.025)    | -2.664<br>(1.971)   |
| $\beta_{LhLl}$ |     |                      | -0.049***<br>(0.013) | 0.965<br>(0.627)    |
| $\beta_{LmLm}$ |     |                      | 0.029<br>(0.027)     | 0.243<br>(0.190)    |
| $\beta_{LmLl}$ |     |                      | -0.031<br>(0.026)    | -3.800<br>(2.927)   |
| $\beta_{LlLl}$ |     |                      | 0.022***<br>(0.007)  | 0.890**<br>(0.397)  |
| N              | 894 | 882                  | 882                  | 814                 |

Notes: \*\*\* $p < 0.01$ , \*\* $p < 0.05$ , \* $p < 0.1$ . Industry and year dummies as well as average work experience for the three education levels are suppressed for brevity. Standard errors are in parentheses. Numbers of observations differ slightly in columns (3) – (5) due to missing values in the three education levels (logarithmic) and the lagged independent variables.

**Table A3. Estimated AES and MES (3 Factors) – Full Sample**

| Input $i$ | Input $j$ | AES $_{ij}$         | MES $_{ij}$         | Interpretation |
|-----------|-----------|---------------------|---------------------|----------------|
| $C$       | $L$       | 0.958***<br>(0.021) | 1.201***<br>(0.010) | Substitutes    |
| $L$       | $C$       | 0.958***<br>(0.021) | 1.781***<br>(0.031) | Substitutes    |

Notes: Bootstrapped standard errors are in parentheses.

\*\*\* $p < 0.01$ , \*\* $p < 0.05$ , \* $p < 0.1$ .

**Table A4. Estimated Coefficients for Routine- vs. Nonroutine-Intensive Industries**

| Independent Variables | Routine-intensive Industries | Nonroutine-intensive Industries |
|-----------------------|------------------------------|---------------------------------|
| $\alpha_C$            | 0.701***<br>(0.195)          | 0.377*<br>(0.230)               |
| $\alpha_K$            | -2.85<br>(2.95)              | 0.783***<br>(0.238)             |
| $\alpha_{Lh}$         | 1.265***<br>(0.146)          | 0.192***<br>(0.025)             |
| $\alpha_{Lm}$         | 0.964***<br>(0.340)          | 0.411*<br>(0.225)               |
| $\alpha_{Ll}$         | 0.741***<br>(0.155)          | 0.265*<br>(0.152)               |
| $\beta_{CC}$          | 0.036***<br>(0.014)          | 0.034***<br>(0.009)             |
| $\beta_{CK}$          | -0.119***<br>(0.029)         | -0.023<br>(0.021)               |
| $\beta_{CLh}$         | -0.093***<br>(0.020)         | 0.009**<br>(0.004)              |
| $\beta_{CLm}$         | 0.087**<br>(0.041)           | -0.011<br>(0.020)               |
| $\beta_{CLl}$         | -0.019<br>(0.024)            | 0.014<br>(0.009)                |
| $\beta_{KK}$          | 0.257***<br>(0.023)          | 0.037**<br>(0.018)              |
| $\beta_{KLh}$         | -0.038*<br>(0.022)           | -0.005<br>(0.012)               |
| $\beta_{KLm}$         | -0.033<br>(0.051)            | -0.018<br>(0.023)               |
| $\beta_{KLl}$         | -0.034<br>(0.025)            | -0.005<br>(0.013)               |
| $\beta_{LhLh}$        | 0.070***<br>(0.014)          | 0.016**<br>(0.007)              |
| $\beta_{LhLm}$        | 0.030<br>(0.051)             | -0.029<br>(0.028)               |
| $\beta_{LhLl}$        | -0.103***<br>(0.028)         | -0.022**<br>(0.011)             |
| $\beta_{LmLm}$        | -0.158***<br>(0.056)         | 0.061**<br>(0.028)              |

|                |                     |                      |
|----------------|---------------------|----------------------|
| $\beta_{LmLl}$ | 0.134**<br>(0.064)  | -0.083***<br>(0.031) |
| $\beta_{Llll}$ | -0.048**<br>(0.019) | 0.041***<br>(0.009)  |
| N              | 439                 | 443                  |

Notes: \*\*\* $p < 0.01$ , \*\* $p < 0.05$ , \* $p < 0.1$ . Industry and year dummies as well as average work experience for the three education levels are suppressed for brevity. Standard errors are in parentheses.

**Table A5. Estimated Coefficients for High-AIE vs. Low-AIE Industries**

| Independent Variables | High-AIE Industries  | Low-AIE Industries   |
|-----------------------|----------------------|----------------------|
| $\alpha_C$            | 0.550***<br>(0.197)  | 0.331***<br>(0.083)  |
| $\alpha_K$            | 0.303<br>(0.406)     | 2.473***<br>(0.576)  |
| $\alpha_{Lh}$         | 1.282***<br>(0.202)  | 0.282*<br>(0.164)    |
| $\alpha_{Lm}$         | 0.016**<br>(0.008)   | 1.358**<br>(0.533)   |
| $\alpha_{Ll}$         | 0.874***<br>(0.328)  | 0.330**<br>(0.173)   |
| $\beta_{CC}$          | -0.007<br>(0.012)    | 0.003<br>(0.022)     |
| $\beta_{CK}$          | -0.045**<br>(0.023)  | -0.016<br>(0.035)    |
| $\beta_{CLh}$         | -0.036*<br>(0.021)   | 0.006**<br>(0.003)   |
| $\beta_{CLm}$         | 0.055<br>(0.038)     | -0.006<br>(0.054)    |
| $\beta_{CLl}$         | 0.008<br>(0.025)     | 0.015<br>(0.043)     |
| $\beta_{KK}$          | 0.028<br>(0.018)     | -0.081***<br>(0.027) |
| $\beta_{KLh}$         | -0.024<br>(0.019)    | -0.019<br>(0.015)    |
| $\beta_{KLm}$         | -0.056*<br>(0.033)   | -0.027<br>(0.045)    |
| $\beta_{KLl}$         | 0.055**<br>(0.027)   | -0.021<br>(0.039)    |
| $\beta_{LhLh}$        | 0.076***<br>(0.018)  | 0.021**<br>(0.010)   |
| $\beta_{LhLm}$        | -0.094*<br>(0.052)   | 0.081**<br>(0.040)   |
| $\beta_{LhLl}$        | -0.103***<br>(0.030) | -0.105***<br>(0.027) |
| $\beta_{LmLm}$        | 0.073<br>(0.052)     | -0.133**<br>(0.065)  |

|                |                     |                  |
|----------------|---------------------|------------------|
| $\beta_{LmLl}$ | -0.012<br>(0.050)   | 0.071<br>(0.097) |
| $\beta_{LlLl}$ | 0.066***<br>(0.020) | 0.056<br>(0.040) |
| N              | 417                 | 406              |

Notes: \*\*\* $p < 0.01$ , \*\* $p < 0.05$ , \* $p < 0.1$ . Industry and year dummies as well as average work experience for the three education levels are suppressed for brevity. Standard errors are in parentheses.

## Appendix G: Percentages of Labor Inputs over Time based on AI Exposure and STEM Intensity

**Figure A1. Percentages of Labor Inputs over Time (High-AIE Industries)**

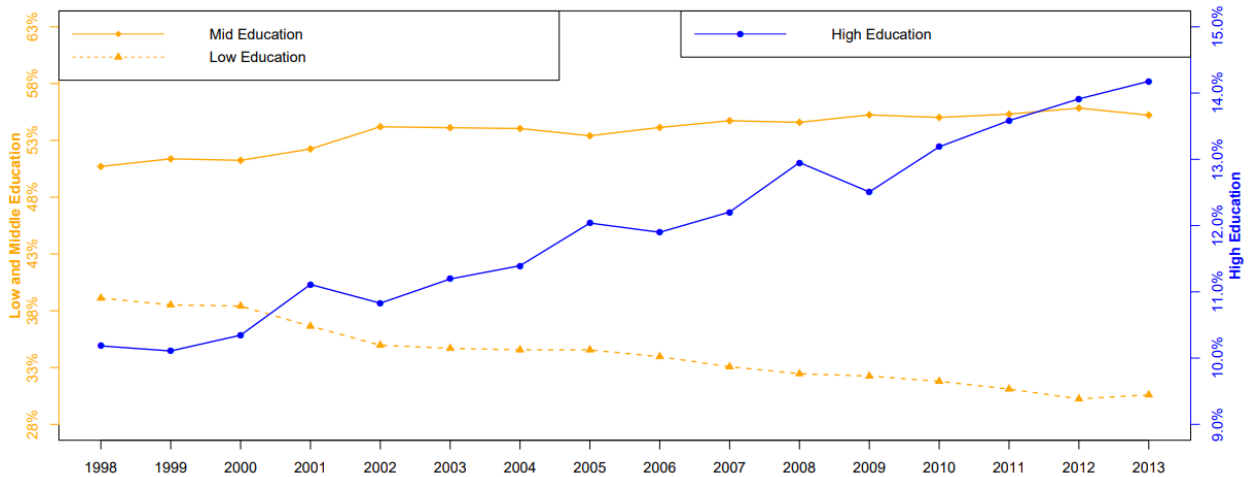

Note: The scale for high-education labor is on the right and that for low- and middle-education levels on the left. Same for Figures A2, A3, and A4.

**Figure A2. Percentages of Labor Inputs over Time (Low-AIE Industries)**

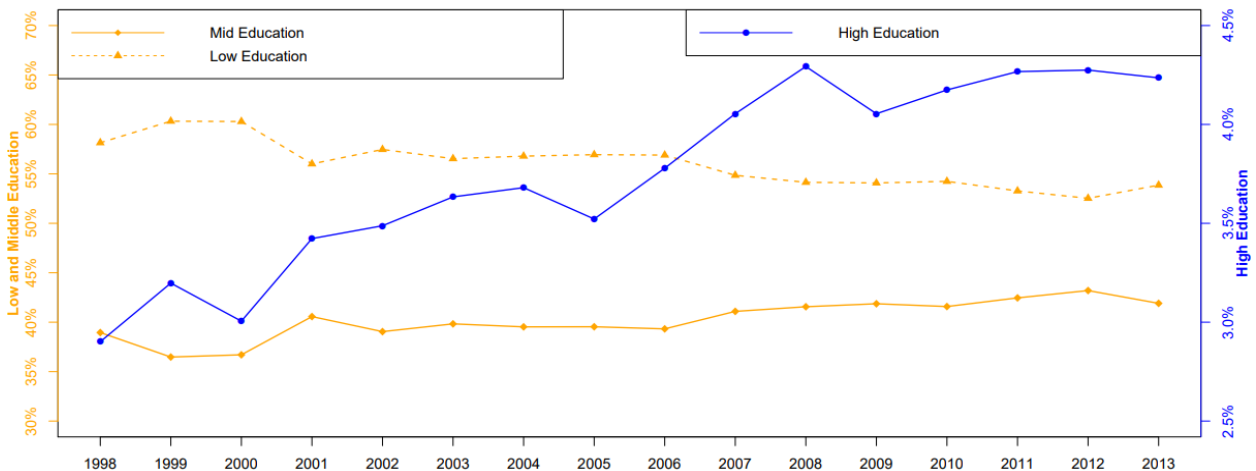

**Figure A3. Percentages of Labor Inputs over Time (High-STEM Industries)**

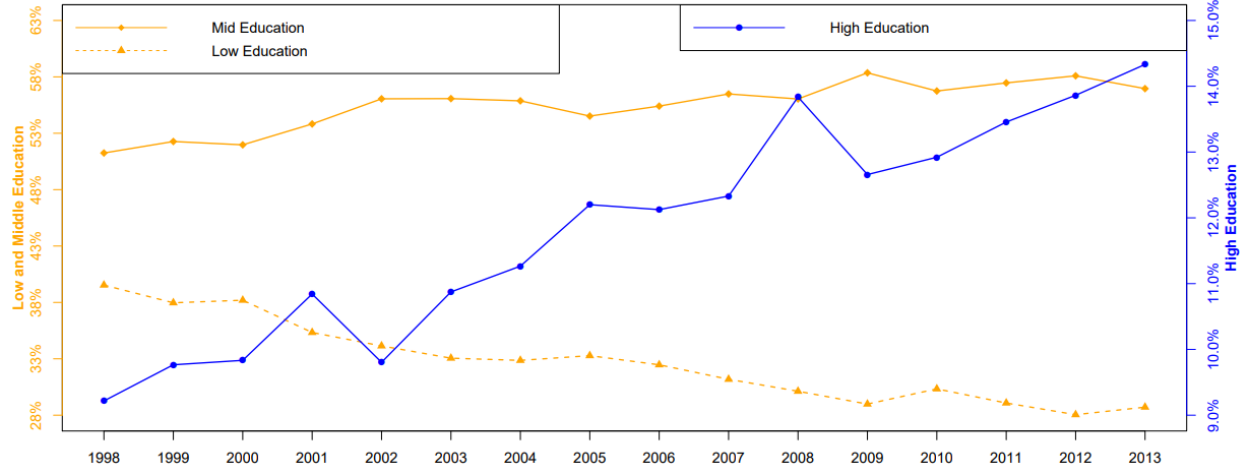

**Figure A4. Percentages of Labor Inputs over Time (Low-STEM Industries)**

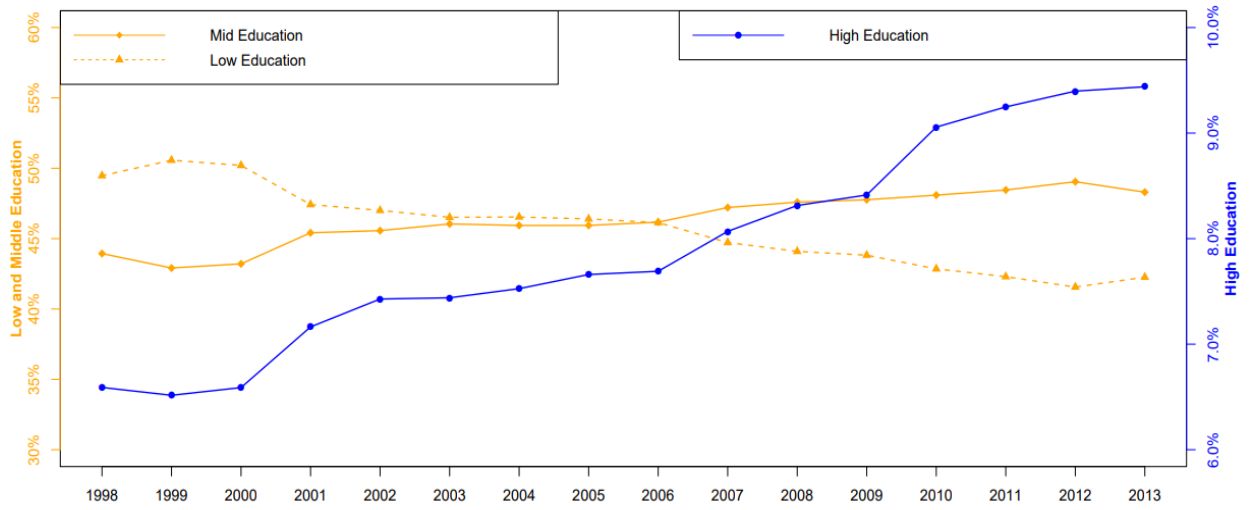

## Appendix H: The Impact of STEM Occupations

Our study is also related to the broad literature on STEM occupations. STEM refers to the academic fields of science, technology, engineering, and mathematics. STEM fields and occupations have long been viewed as drivers of innovation and catalysts of economic growth and competitiveness (Waite and McDonald 2019; Winters 2013). STEM workers have specialized skills that support research and development activities, increasing the productivity of all workers in the economy. STEM occupations can work on tasks that could be either manual or cognitive by nature and exist in both manufacturing and service industries. Increasing the size of the STEM workforce has been a key strategy to maintain the economic competitiveness and growth of the U.S. economy (Korte et al. 2019).

There has been an established literature on the how to address to the growing demand for STEM education (Castleman et al. 2018; Waite and McDonald 2019), importance of STEM education to wage and economic growth and global competition (Black et al. 2021; Cover et al. 2011; Stewart et al. 2020; Winters 2013), gender disparity on STEM performance (Anaya et al. 2022), and the impact of STEM immigrants on domestic workers and the local economy (Cai and Winters 2017; Gunadi 2019; Ransom and Winters 2021; Turner 2022). However, to the best of our knowledge, there has been little empirical evidence from prior literature on how STEM occupations may moderate the relationship between technology and labor. To this regard, we divide all industries into those with relatively higher and lower percentages of STEM workers.

To derive the percentages of STEM workers for each industry, we follow the same approach that we use to derive the routine/nonroutine intensive industries (see Section 4.2.3 in the paper). We first identified the STEM occupations using the US Census Bureau STEM Occupation Code.<sup>1</sup> Then, for all employees in the CPS surveys, we categorized them into STEM or non-STEM employees and calculated the percentage of STEM employees in each industry. We use the median STEM percentage in our sample to divide all industries into high-STEM and low-STEM industries. A complete classification of the high- and low-STEM industries is presented in Online Appendix D. We note that 39% of the high-STEM

---

<sup>1</sup> <https://www.census.gov/topics/employment/industry-occupation/guidance/code-lists.html>

industries are nonroutine industries, and 56% of the low-STEM industries are nonroutine. The percentages of labor inputs for high-STEM and low-STEM subsamples are presented in Online Appendix G.

Conceptually, in high-STEM industries, workers are trained to be better prepared to work with IT, particularly for those with higher-education level. Table A6 in Online Appendix H presents the FGLS estimation results for Equation (4) for high-STEM and low-STEM subsamples. The AES and MES estimates for high- versus low-STEM industries are present in Table A7. For the high-STEM industries, IT is a strong complement with high-education labor but a substitute for low- and middle-education labor; for low-STEM industries, IT and labor are substitutes regardless of education levels. These results suggest that for industries that require a relatively higher level of STEM skills, IT is replacing low- and middle-education level labor but complementing high-education labor; for the industries requiring a relatively lower level of STEM skills, IT is replacing labor of all education levels. This is likely because, while high-education labor and IT tend to be complements in general (Griliches 1969), this complementarity is hard to materialize in low-STEM industries, primarily because the high-education labor in these industries may not have the sufficient skills to make effective use existing technologies as well as to explore the introduction and implementation of new technologies.

**Table A6. Estimated Coefficients for High-STEM vs. Low-STEM Industries**

| <b>Independent Variables</b> | <b>High-STEM Industries</b> | <b>Low-STEM Industries</b> |
|------------------------------|-----------------------------|----------------------------|
| $\alpha_C$                   | 1.106***<br>(0.211)         | 0.502**<br>(0.234)         |
| $\alpha_K$                   | 1.588***<br>(0.257)         | -1.112<br>(0.801)          |
| $\alpha_{Lh}$                | 0.152*<br>(0.810)           | 1.003***<br>(0.136)        |
| $\alpha_{Lm}$                | 0.953**<br>(0.402)          | 0.476**<br>(0.197)         |
| $\alpha_{Ll}$                | -0.401***<br>(0.144)        | -0.389*<br>(0.201)         |
| $\beta_{CC}$                 | 0.021<br>(0.027)            | 0.037**<br>(0.016)         |
| $\beta_{CK}$                 | -0.135***<br>(0.033)        | -0.101***<br>(0.029)       |
| $\beta_{CLh}$                | -0.054*<br>(0.031)          | 0.004<br>(0.014)           |
| $\beta_{CLm}$                | 0.039<br>(0.083)            | 0.031<br>(0.035)           |
| $\beta_{CLl}$                | 0.042**<br>(0.021)          | -0.007<br>(0.024)          |
| $\beta_{KK}$                 | 0.008<br>(0.015)            | 0.099***<br>(0.029)        |
| $\beta_{KLh}$                | 0.036<br>(0.023)            | -0.024**<br>(0.012)        |
| $\beta_{KLm}$                | -0.064<br>(0.048)           | 0.032<br>(0.038)           |
| $\beta_{KLl}$                | 0.031<br>(0.040)            | -0.021<br>(0.030)          |
| $\beta_{LhLh}$               | 0.027*<br>(0.015)           | 0.052***<br>(0.010)        |
| $\beta_{LhLm}$               | 0.088*<br>(0.053)           | -0.086**<br>(0.043)        |
| $\beta_{LhLl}$               | -0.132***<br>(0.032)        | -0.090***<br>(0.026)       |
| $\beta_{LmLm}$               | -0.030<br>(0.071)           | -0.068<br>(0.057)          |
| $\beta_{LmLl}$               | -0.051<br>(0.090)           | 0.036<br>(0.070)           |
| $\beta_{LlLl}$               | 0.056<br>(0.034)            | 0.086***<br>(0.026)        |
| N                            | 437                         | 445                        |

Notes: \*\*\* $p < 0.01$ , \*\* $p < 0.05$ , \* $p < 0.1$ . Industry and year dummies as well as average work experience for the three education levels are suppressed for brevity. Standard errors are in parentheses.

**Table A7. Interpretation of the AES<sub>ij</sub> and MES<sub>ij</sub> Estimates: High- vs. Low-STEM Industries**

| Input <i>i</i> | Input <i>j</i> | High-STEM Industries |                      |                       | Low-STEM Industries |                     |                |
|----------------|----------------|----------------------|----------------------|-----------------------|---------------------|---------------------|----------------|
|                |                | AES <sub>ij</sub>    | MES <sub>ij</sub>    | Interpretation        | AES <sub>ij</sub>   | MES <sub>ij</sub>   | Interpretation |
| <i>C</i>       | <i>Lh</i>      | -1.016***<br>(0.099) | -0.027***<br>(0.001) | Strong<br>Complements | 1.989***<br>(0.072) | 0.198***<br>(0.028) | Substitutes    |
| <i>C</i>       | <i>Lm</i>      | 1.600***<br>(0.155)  | 0.232***<br>(0.017)  | Substitutes           | 1.047***<br>(0.077) | 0.612***<br>(0.020) | Substitutes    |
| <i>C</i>       | <i>Ll</i>      | 2.205***<br>(0.123)  | 0.537***<br>(0.075)  | Substitutes           | 2.421***<br>(0.192) | 1.377***<br>(0.069) | Substitutes    |
| <i>Lh</i>      | <i>C</i>       | -1.016***<br>(0.099) | -1.370***<br>(0.036) | Strong<br>Complements | 1.989***<br>(0.072) | 0.053***<br>(0.007) | Substitutes    |
| <i>Lm</i>      | <i>C</i>       | 1.600***<br>(0.155)  | 1.092***<br>(0.028)  | Substitutes           | 1.047***<br>(0.077) | 0.360***<br>(0.045) | Substitutes    |
| <i>Ll</i>      | <i>C</i>       | 2.205***<br>(0.123)  | 1.971***<br>(0.045)  | Substitutes           | 2.421***<br>(0.192) | 0.030***<br>(0.007) | Substitutes    |

Notes: *C* is IT capital; *Ll*, *Lm*, and *Lh* are low-education, middle-education, and high-education labor, respectively.

## References

- Anaya, L., Stafford, F., and Zamarró, G. 2022. "Gender Gaps in Math Performance, Perceived Mathematical Ability and College Stem Education: The Role of Parental Occupation," *Education Economics* (30:2), pp. 113-128.
- Black, S. E., Muller, C., Spitz-Oener, A., He, Z., Hung, K., and Warren, J. R. 2021. "The Importance of Stem: High School Knowledge, Skills and Occupations in an Era of Growing Inequality," *Research Policy* (50:7).
- Cai, Z., and Winters, J. V. 2017. "Self-Employment Differentials among Foreign-Born Stem and Non-Stem Workers," *Journal of Business Venturing* (32:4), pp. 371-384.
- Castleman, B., Long, B. T., and Mabel, Z. 2018. "Can Financial Aid Help to Address the Growing Need for Stem Education? The Effects of Need-Based Grants on the Completion of Science, Technology, Engineering, and Math Courses and Degrees," *Journal of Policy Analysis & Management* (37:1), pp. 136-156.
- Cover, B., Jones, J. I., and Watson, A. 2011. "Science, Technology, Engineering, and Mathematics (Stem) Occupations: A Visual Essay," *Monthly Labor Review* (134:5), pp. 3-15.
- Griliches, Z. 1969. "Capital-Skill Complementarity," *The Review of Economics and Statistics* (51:4), pp. 465-468.
- Gunadi, C. 2019. "An Inquiry on the Impact of Highly-Skilled Stem Immigration on the U.S. Economy," *Labour Economics* (61).
- Korte, R., Brunhaver, S., and Zehr, S. M. 2019. "The Socialization of Stem Professionals into Stem Careers: A Study of Newly Hired Engineers," *Advances in Developing Human Resources* (21:1), pp. 92-113.
- Ransom, T., and Winters, J. V. 2021. "Do Foreigners Crowd Natives out of Stem Degrees and Occupations? Evidence from the Us Immigration Act of 1990," *Ilr Review* (2), pp. 321-351.

- Stewart, F., Yeom, M., and Stewart, A. 2020. "Stem and Soft Occupational Competencies: Analyzing the Value of Strategic Regional Human Capital," *Economic Development Quarterly* (34:4), pp. 356-371.
- Turner, P. S. 2022. "High-Skilled Immigration and the Labor Market: Evidence from the H-1b Visa Program," *Journal of Policy Analysis and Management* (41:1), pp. 92-130.
- Waite, A. M., and McDonald, K. S. 2019. "Exploring Challenges and Solutions Facing Stem Careers in the 21st Century: A Human Resource Development Perspective," *Advances in Developing Human Resources* (21:1), pp. 3-15.
- Winters, J. V. 2013. "Stem Graduates, Human Capital Externalities, and Wages in the U.S.," *Discussion Paper Series, IZA*.
